# Supplementary material
Source: publisher figshare collection journal article supplement (https://acs.figshare.com/ndownloader/files/4603852)
Supplement: Supplementary file 1 [file 4603852]

# Facile Synthesis of $\text{CePO}_4$ Nanowires Attached to $\text{CeO}_2$ Octahedral Micron Crystals and Their Enhanced Photoluminescence Properties

Guicun Li,\* Kun Chao, Hongrui Peng, Kezheng Chen, and Zhikun Zhang

## Supporting Information

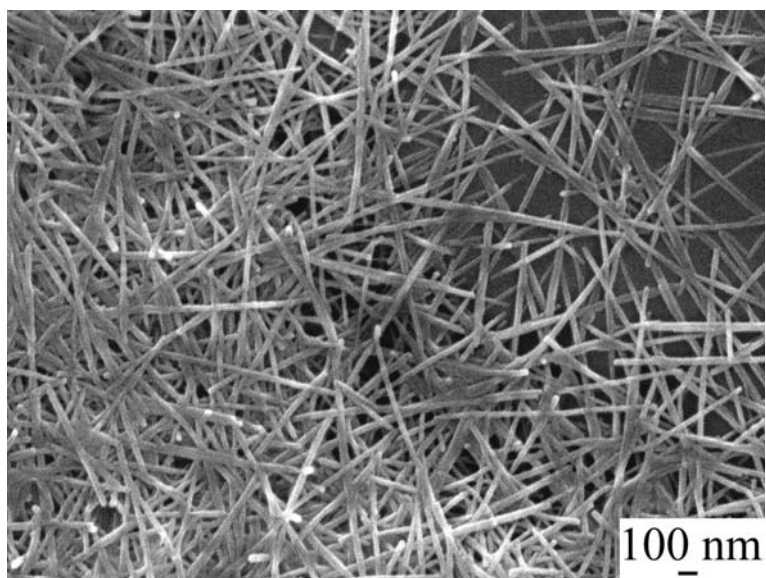

**Figure S1.** SEM images of pure  $\text{CePO}_4$  nanowires synthesized with the molar ratio of  $\text{Ce}^{3+}$  and  $\text{PO}_4^{3-} = 1$  at 180 °C for 24 h.

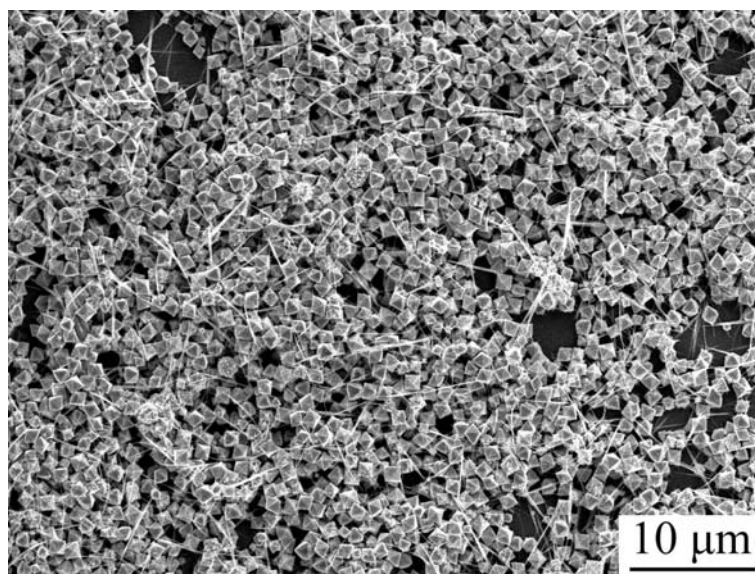

**Figure S2.** Low-magnification SEM images of  $\text{CePO}_4$  nanowires attached to  $\text{CeO}_2$  octahedral micron crystals synthesized with the molar ratio of  $\text{Ce}^{3+}$  and  $\text{PO}_4^{3-} = 2$  at  $180\text{ }^\circ\text{C}$  for 24 h.

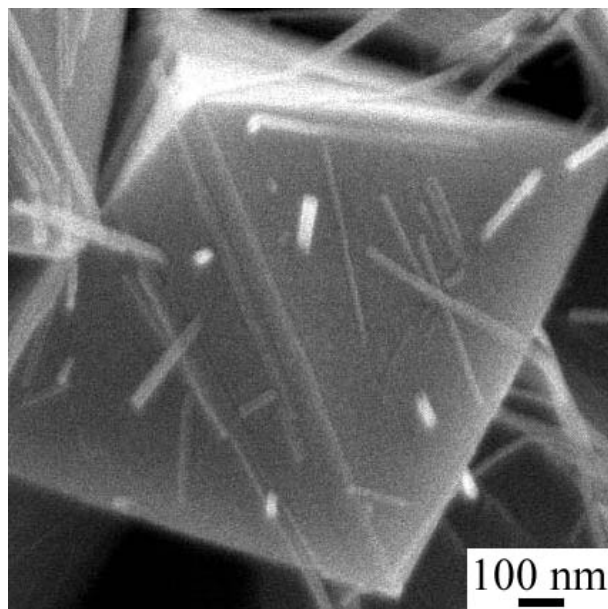

**Figure S3.** High-magnification SEM images of  $\text{CePO}_4$  nanowires attached to  $\text{CeO}_2$  octahedral micron crystals synthesized with the molar ratio of  $\text{Ce}^{3+}$  and  $\text{PO}_4^{3-} = 2$  at  $180\text{ }^\circ\text{C}$  for 24 h.

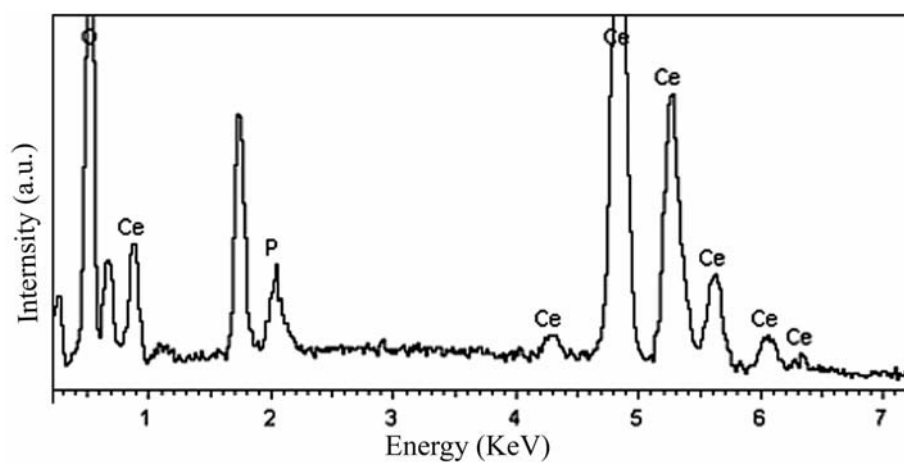

**Figure S4.** EDS spectrum of  $\text{CePO}_4$  nanowires attached to  $\text{CeO}_2$  octahedral micron crystals synthesized with the molar ratio of  $\text{Ce}^{3+}$  and  $\text{PO}_4^{3-} = 2$  at  $180^\circ\text{C}$  for 24 h.

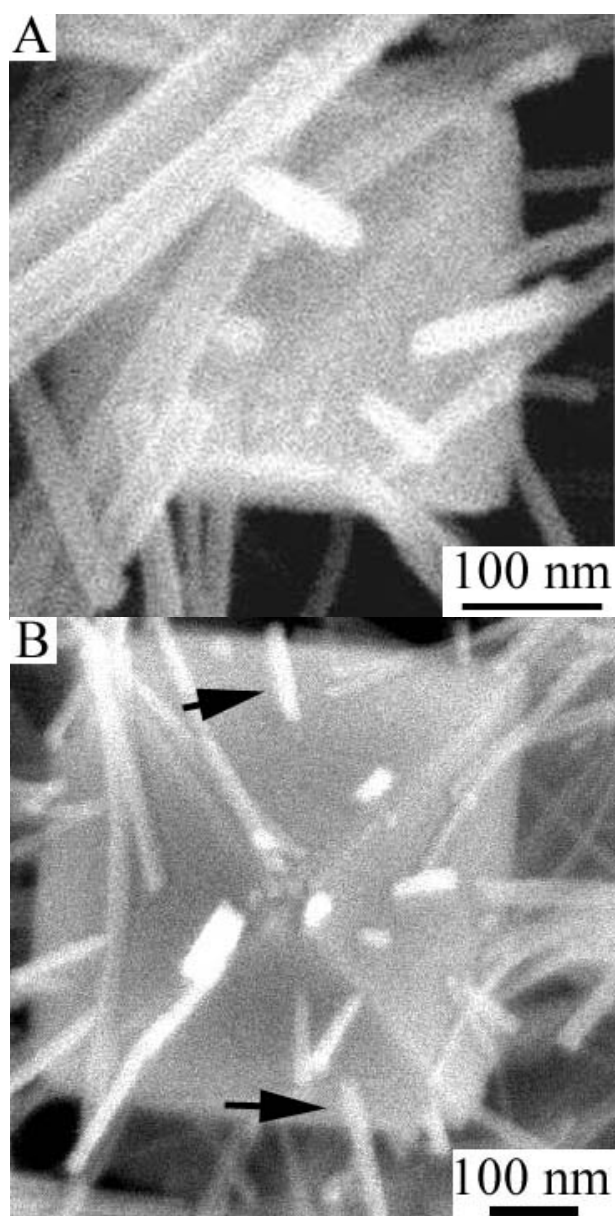

**Figure S5.** High-magnification SEM images of CePO<sub>4</sub> nanowires attached to CeO<sub>2</sub> octahedral micron crystals synthesized with the molar ratio of Ce<sup>3+</sup> and PO<sub>4</sub><sup>3-</sup> = 2 at 180 °C for different reaction times. (A) 5 h; (B) 12 h.
